# Supplementary material for: Development of a RP-HPLC Method for Separating and Quantifying Muscimol in Different Developmental Stages of the Fungus Amanita muscaria
Source: Hindawi journal article supplement (doi:10.1155/2020/8859998), 2020-11-20
Supplement: f1 [file 8859998.f1.docx]

Development of a RP-HPLC method for separating and quantifying muscimol in different developmental stages of the fungus *Amanita muscaria.*

Emersón León Ávila1, James Guevara-Pulido1

*Universidad El Bosque,1 Química Farmacéutica, INQA Research Group, Av Cra 9 No 131A-02, 110121, Bogotá, Colombia Corresponding author joguevara@unbosque.edu.co*

1. **Supplementary Information**

Chromatograms


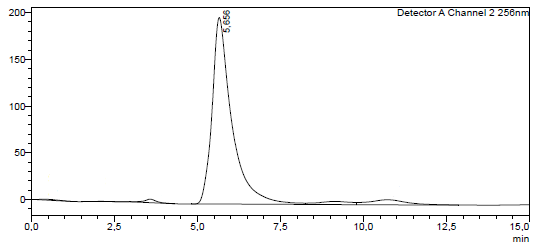


Annex 1. Chromatogram of the standard solution of muscimol


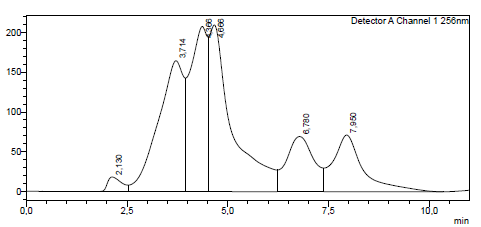


Annex 2. Chromatogram of fungus extract at 256 nm


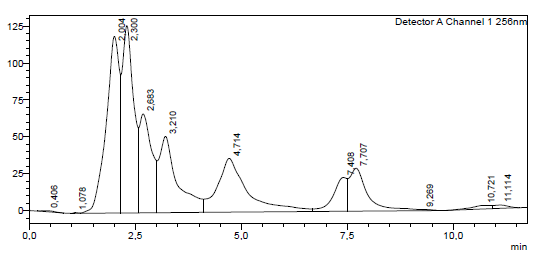


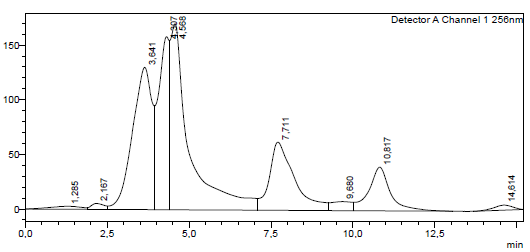


Annexes 3 y 4. Chromatograms of fungus extract and MUS standard solution each with a different mobile phase flow-rate.


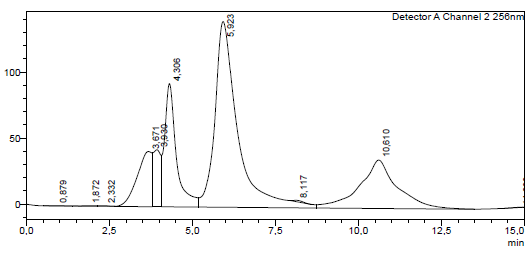


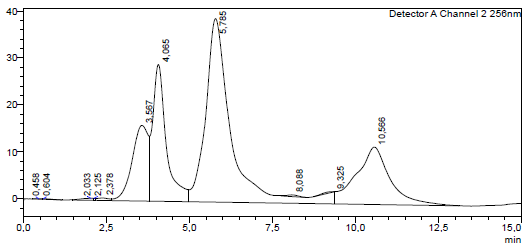


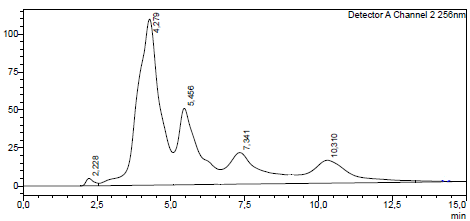


Annexes 5, 6 y 7. Chromatograms of fungus extract and MUS standard solution, each with a different water-MeOH ratio
